# Supplementary material
Source: PubMed Central journal article supplement (PMC2838678)
Supplement: 00374.2009_1.pdf [file 00374.2009_1.pdf]

# Supplemental Figure 1

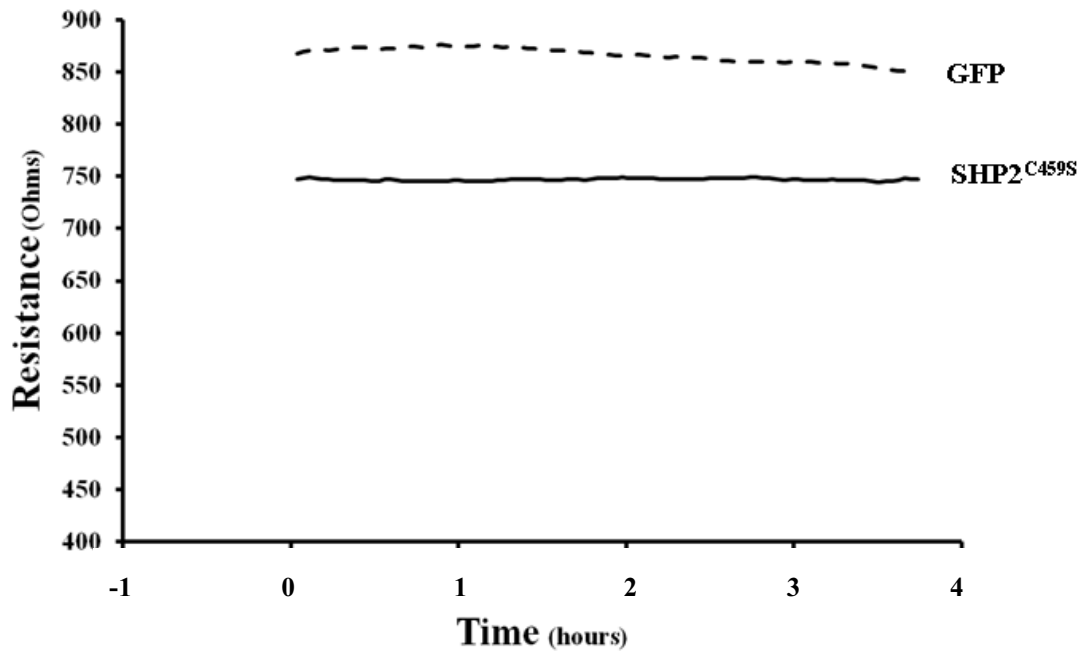

## Supplemental Figure 2

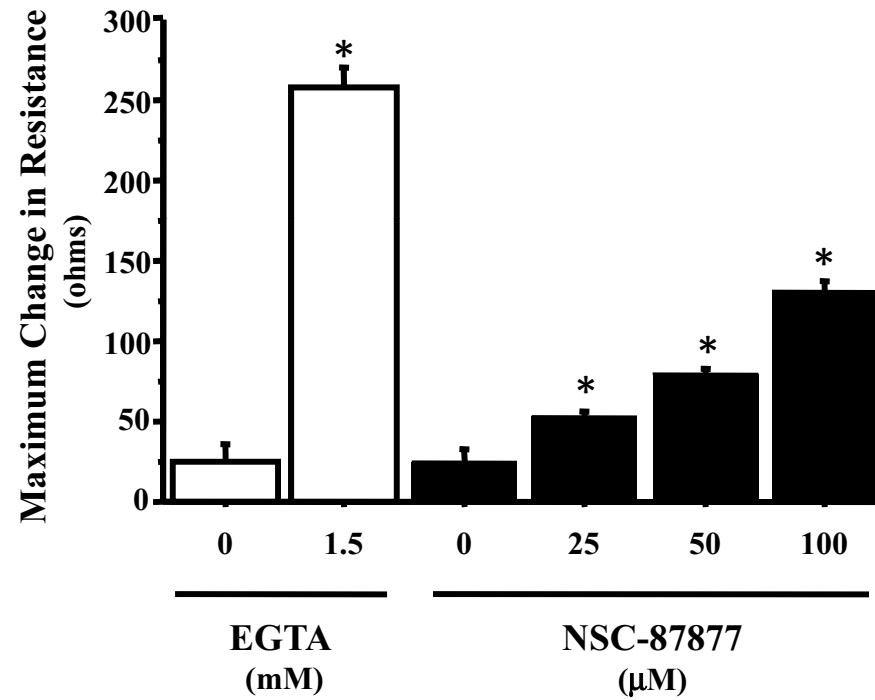

# Supplemental Figure 3

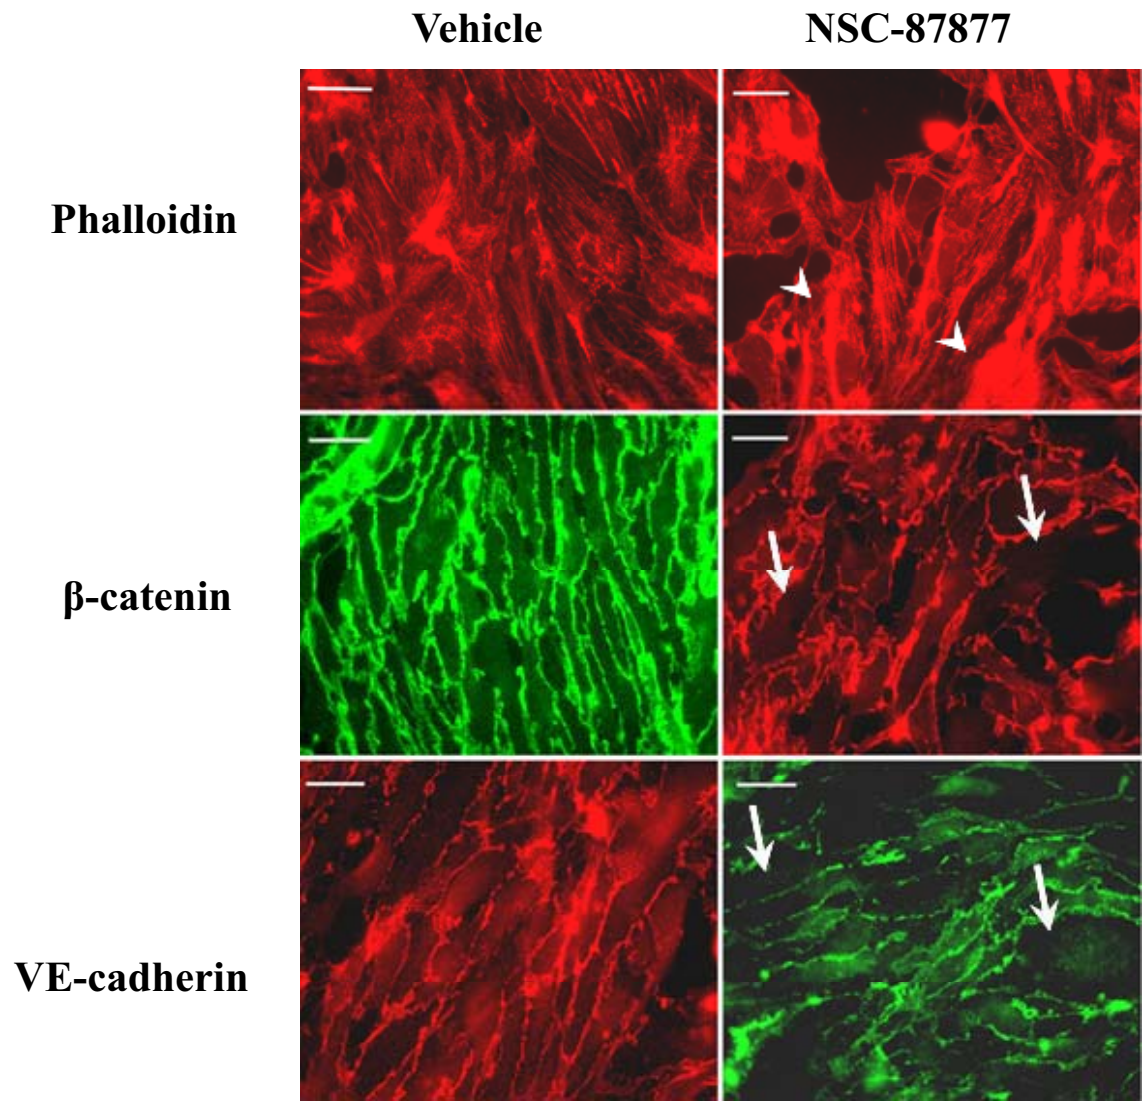

**Supplemental Figure 1. Overexpression of catalytically inactive SHP2 leads to increased endothelial monolayer permeability.** Changes in resistance across monolayers were measured after transient transfection of equivalent numbers of PAEC with GFP (dashed line) or SHP2<sup>C459S</sup> (solid line). Representative tracing is presented. n = 3.

**Supplemental Figure 2. Comparison of the degree of endothelial barrier dysfunction.** Changes in resistance across monolayers of LMVEC were measured following exposure to vehicle (○), 1.5mM EGTA, or indicated dose of NSC-87877. The maximum change in resistance is presented for each group. Vehicle for EGTA, n=2; 1.5mM EGTA, n=5; NSC-87877 treatments, n=4. \* p < 0.05 vs. vehicle for each group.

**Supplemental Figure 3. SHP2 inhibition causes increased stress fibers and AJ disassembly.** LMVEC were incubated with 100 μM NSC-87877 for 3h, then fixed and stained for actin, β-catenin or VE-cadherin. Arrows=interendothelial gapping; arrowheads= increased stress fiber formation. Scale bars=20 μM.
